# Supplementary material
Source: Springer Nature journal article supplement (https://www.springermedizin.de/resource/supplementary/12957_2011_937_MOESM2_ESM.pdf/9562112)

G A C G G A G G T T G T G A G G C A C T G  
130 140  
G→A(175)

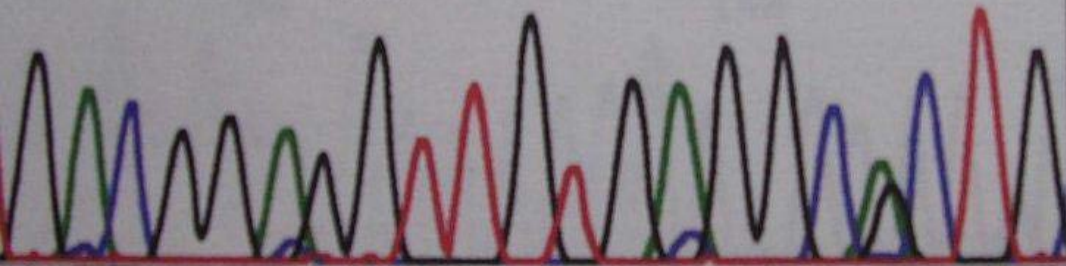

Supplement: MOESM2 [file 9562112]
